# Supplementary material for: Correlation between rCBV Delineation Similarity and Overall Survival in a Prospective Cohort of High-Grade Gliomas Patients: The Hidden Value of Multimodal MRI?
Source: MDPI journal article supplement (doi:10.3390/biomedicines12040789), 2024-04-03
Supplement: s1 [file s1]

## **SUPPLEMENTARY MATERIALS**

**Supplementary Table S1.** Main MRI acquisition parameters

**Supplementary Table S2.** Dice comparison (p-value) between each sequence (Wilcoxon test).

**Supplementary Table S3.** Spatial complementarity: DSC (mean +/- SD) for T1Gado, T2Flair and FET.

**Supplementary Table S4.** Correlation between progression free survival (PFS) and intra-sequence variability: univariate and multivariable analysis using Cox regression.

**Supplementary Figure S1.** Progression-Free Survival curve regarding surgery using Kaplan Meier.

**Supplementary Figure S2.** Overall Survival curve regarding surgery using Kaplan Meier.

**Supplementary Table S1.** Main MRI acquisition parameters

| MRI scanner      | SIEMENS 1.5 T |            |              |                            | GE MEDICAL SYSTEM 1.5 |            |              |                    |
|------------------|---------------|------------|--------------|----------------------------|-----------------------|------------|--------------|--------------------|
| SEQUENCE         | TE<br>(ms)    | TR<br>(ms) | MATRIX       | SLICE<br>THICKNESS<br>(mm) | TE<br>(ms)            | TR<br>(ms) | MATRIX       | SLICE<br>THICKNESS |
| T1<br>GADOLINIUM | 7.1           | 600        | 256 x<br>256 | 1                          | 16.74                 | 452        | 256 x<br>256 | 1                  |
| T2 FLAIR         | 335           | 5000       | 256 x<br>217 | 1                          | 137                   | 452        | 192 x<br>192 | 1,6                |
| rCBV             | 30            | 1650       | 128 x<br>128 | 5                          | 30                    | 2290       | 128 x<br>128 | 5                  |
| DIFFUSION/ADC    | 95            | 2800       | 192 x<br>192 | 4                          | 69.7                  | 9645       | 128 x<br>128 | 4                  |
| K2               | 30            | 1650       | 128 x<br>128 | 5                          | 30                    | 2290       | 128 x<br>128 | 5                  |

Abbreviations: MRI: Magnetic Resonance Imaging, TE: Time of Echo, TR: Time of Repetition, ms: mili-second, rCBV: Relative cerebral blood volume, ADC: Apparent diffusion coefficient

**Supplementary Table S2.** Dice comparison (p-value) between each sequence (Wilcoxon test).

| DICE Comparison       | T1Gado   | T2Flair  | T1GadoFlair | T1GadoFlairFET | K2       | rCBV     | ADC      | Diffusion |
|-----------------------|----------|----------|-------------|----------------|----------|----------|----------|-----------|
| <b>T1Gado</b>         | -        |          |             |                |          |          |          |           |
| <b>T2Flair</b>        | < 0.0001 | -        |             |                |          |          |          |           |
| <b>T1GadoFlair</b>    | 0.0001   | < 0.0001 | -           |                |          |          |          |           |
| <b>T1GadoFlairFET</b> | 0.0005   | 0.0004   | 0.69        | -              |          |          |          |           |
| <b>K2</b>             | < 0.0001 | 0.0013   | 0.0001      | < 0.0001       | -        |          |          |           |
| <b>rCBV</b>           | < 0.0001 | < 0.0001 | < 0.0001    | < 0.0001       | 0.0001   | -        |          |           |
| <b>ADC</b>            | < 0.0001 | < 0.0001 | < 0.0001    | < 0.0001       | < 0.0001 | 0.01     | -        |           |
| <b>Diffusion</b>      | < 0.0001 | < 0.0001 | < 0.0001    | < 0.0001       | 0.0003   | 0.92     | 0.04     | -         |
| <b>FET</b>            | 0.008    | 0.30     | 0.32        | 0.13           | 0.0001   | < 0.0001 | < 0.0001 | < 0.0001  |

**Supplementary Table S3.** Spatial complementarity: DSC (mean +/- SD) for T1Gado, T2Flair and FET.

| DICE MEAN (STANDARD DEVIATION) |             |             |             |             |
|--------------------------------|-------------|-------------|-------------|-------------|
| SEQUENCE                       | T1GADO      | T2FLAIR     | FET         | T1GadoFlair |
| T1GadoFlair                    | 0.60 (0.24) | 0.91 (0.16) | 0.45 (0.17) | -           |
| T1GadoFlairFET                 | 0.52 (0.21) | 0.82 (0.21) | 0.59 (0.20) | 0.89 (0.14) |

**Supplementary Table S4.** Correlation between progression free survival (PFS) and intra-sequence variability: univariate and multivariable analysis using Cox regression.

Note. Class (0): 0.00-0.19, Class (1): 0.20-0.39, Class (2): 0.40-0.59, Class (3): 0.60-0.79, Class (4): 0.80-1

Multivariate analysis was conducted but only with preselected significant ( $p < 0.20$ ) variables.

PS: performance status, HR: Hazard Ratio, CI: Confidence Interval, MGMT: O<sup>6</sup>-methylguanine-DNA-methyltransferase, IDH : isocitrate deshydrogenase

|                                   | Univariate |      | Multivariate |       |          |        |
|-----------------------------------|------------|------|--------------|-------|----------|--------|
|                                   | p          | HR   | p            | HR    | CI95% HR |        |
|                                   |            |      |              |       | Lower    | Higher |
| AGE *                             | 0.97       | 1    |              |       |          |        |
| PS                                | 0.43       |      |              |       |          |        |
| GRADE                             | 0.54       | 1.40 |              |       |          |        |
| SURGERY (ref = no surgery)        | 0.05       | 0.47 | 0.06         | 0.40  | 0.15     | 1.02   |
| IDH (ref = not mutated IDH status | 0.22       | 0.28 |              |       |          |        |
| MGMT (ref = not methylated MGMT)  | 0.05       | 0.47 | 0.08         | 0.43  | 0.16     | 1.12   |
| T1GADO                            | 0.25       | 1.6  |              |       |          |        |
| T2FLAIR (ref = class 1)           | 0.73       |      |              |       |          |        |
|                                   | Class 2    | 0.5  |              |       |          |        |
|                                   | Class 3    | 0.71 |              |       |          |        |
|                                   | Class 4    | 0.81 |              |       |          |        |
| ADC (ref = class 0)               | 0.69       |      |              |       |          |        |
|                                   | Class 1    | 0.87 |              |       |          |        |
|                                   | Class 2    | 0.25 |              |       |          |        |
|                                   | Class 3    | 0.82 |              |       |          |        |
| K2 (ref = class 0)                | 0.58       |      |              |       |          |        |
|                                   | Class 1    | 0.5  |              |       |          |        |
|                                   | Class 2    | 0.4  |              |       |          |        |
|                                   | Class 3    | 0.29 |              |       |          |        |
|                                   | Class 4    | 0.12 |              |       |          |        |
| RCBV (ref = Class 0)              | 0.04       |      | 0.09         |       |          |        |
|                                   | Class 1    | 0.28 | 0.13         | 2.55  | 0.75     | 8.66   |
|                                   | Class 2    | 0.01 | 0.02         | 12.90 | 1.43     | 116.70 |
|                                   | Class 3    | 0.05 | 0.02         | 9.76  | 1.53     | 62.13  |
| DIFFUSION (ref = Class 0)         | 0.26       |      |              |       |          |        |
|                                   | Class 1    | 0.65 |              |       |          |        |
|                                   | Class 2    | 0.73 |              |       |          |        |
|                                   | Class 3    | 0.95 |              |       |          |        |
| T1GADOFLAIR (ref = Class 2)       | 0.58       |      |              |       |          |        |
|                                   | Class 3    | 0.3  |              |       |          |        |
|                                   | Class 4    | 0.5  |              |       |          |        |
| T1GADOFLAIRFET (ref = Class 2)    | 0.96       |      |              |       |          |        |
|                                   | Class 3    | 0.93 |              |       |          |        |
|                                   | Class 4    | 0.84 |              |       |          |        |
| FET (ref = Class 2)               | 1          |      |              |       |          |        |
|                                   | Class 3    | 0.92 |              |       |          |        |
|                                   | Class 4    | 0.92 |              |       |          |        |
| Vol_RCBV                          | 0.12       | 1.01 | 0.29         | 0.98  | 0.95     | 1.02   |

**Supplementary Figure S1.** Progression-Free Survival curve regarding surgery using Kaplan Meier.

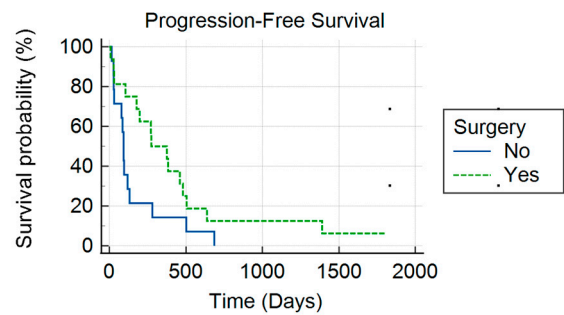

Number at risk

|            |    |   |   |   |   |
|------------|----|---|---|---|---|
| Group: No  | 14 | 2 | 0 | 0 | 0 |
| Group: Yes | 16 | 4 | 2 | 1 | 0 |

**Supplementary Figure S2.** Overall Survival curve regarding surgery using Kaplan Meier.  
Time is expressed in days

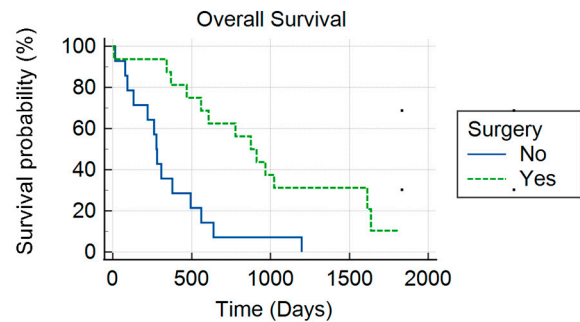

Number at risk

|            |    |    |   |   |   |
|------------|----|----|---|---|---|
| Group: No  | 14 | 3  | 1 | 0 | 0 |
| Group: Yes | 16 | 12 | 6 | 3 | 0 |
